# Supplementary material for: From Ca3Be(SeO3)4 to SrBe(SeO3)2: two unprecedented alkaline earth metal beryllium selenites with large band gaps and enhanced birefringence
Source: Royal Society of Chemistry journal article supplement (doi:10.1039/d5qi00039d), 2025-01-01
Supplement: d5qi00039d1.pdf [file d5qi00039d1.pdf]

## Supplementary Information

### From $\text{Ca}_3\text{Be}(\text{SeO}_3)_4$ to $\text{SrBe}(\text{SeO}_3)_2$ : Two Unprecedented Alkaline Earth Metal Beryllium Selenites with Large Band Gaps and Enhanced Birefringence

Xinyi Wang,<sup>a</sup> Xin Wen,<sup>b</sup> Yuchen Yan,<sup>a</sup> Jindong Chen,<sup>a</sup> Guangsai Yang,<sup>a</sup> Guang Peng,<sup>a,\*</sup> Ning Ye <sup>a,\*</sup>

#### Table of Contents

Table S1. Atomic coordinates and equivalent isotropic displacement parameters for  $\text{Ca}_3\text{Be}(\text{SeO}_3)_4$  and  $\text{SrBe}(\text{SeO}_3)_2$

Table S2. Selected bond lengths and angles for  $\text{Ca}_3\text{Be}(\text{SeO}_3)_4$  and  $\text{SrBe}(\text{SeO}_3)_2$

Table S3. Anisotropic displacement parameters for  $\text{Ca}_3\text{Be}(\text{SeO}_3)_4$  and  $\text{SrBe}(\text{SeO}_3)_2$

Table S4. Direction and magnitude of the dipole moment of  $[\text{SeO}_3]^{2-}$  groups in  $\text{Ca}_3\text{Be}(\text{SeO}_3)_4$  and  $\text{SrBe}(\text{SeO}_3)_2$

Figure S1. Powder X-ray diffraction for  $\text{Ca}_3\text{Be}(\text{SeO}_3)_4$  and  $\text{SrBe}(\text{SeO}_3)_2$

Figure S2. Energy dispersive X-ray spectroscopy (EDS) analysis for  $\text{Ca}_3\text{Be}(\text{SeO}_3)_4$  and  $\text{SrBe}(\text{SeO}_3)_2$

Figure S3. Atomic coordination forms of Ca-O and Sr-O

Figure S4. Thermogravimetric (TG) analysis for  $\text{Ca}_3\text{Be}(\text{SeO}_3)_4$  and  $\text{SrBe}(\text{SeO}_3)_2$

Figure S5. IR spectra for  $\text{Ca}_3\text{Be}(\text{SeO}_3)_4$  and  $\text{SrBe}(\text{SeO}_3)_2$

Figure S6. Calculated band structure for  $\text{Ca}_3\text{Be}(\text{SeO}_3)_4$  and  $\text{SrBe}(\text{SeO}_3)_2$

**Table S1.** Atomic coordinates ( $\times 10^4$ ) and equivalent isotropic displacement parameters ( $\text{\AA}^2 \times 10^3$ ) for  $\text{Ca}_3\text{Be}(\text{SeO}_3)_4$  and  $\text{SrBe}(\text{SeO}_3)_2$ . U(eq) is defined as one third of the trace of the orthogonalized  $U_{ij}$  tensor.

| $\text{Ca}_3\text{Be}(\text{SeO}_3)_4$ |          |          |          |        |
|----------------------------------------|----------|----------|----------|--------|
| Atom                                   | x        | y        | z        | U(eq)  |
| Se(1)                                  | 8093(1)  | 3989 (1) | 3116(1)  | 12 (1) |
| Ca(1)                                  | 10000    | 2500     | 4516 (1) | 13(1)  |
| Ca(2)                                  | 10000    | 7500     | 3750     | 16(1)  |
| O(1)                                   | 9239(5)  | 4423(5)  | 3741(2)  | 20 (1) |
| O(2)                                   | 5852(5)  | 4164(5)  | 3334(2)  | 19(1)  |
| O(3)                                   | 8307(5)  | 6048(5)  | 2788 (2) | 21 (1) |
| Be(1)                                  | 5000     | 2500     | 3750     | 17(2)  |
| $\text{SrBe}(\text{SeO}_3)_2$          |          |          |          |        |
| Atom                                   | x        | y        | z        | U(eq)  |
| Sr(1)                                  | 7497(2)  | 2485(3)  | 2938(2)  | 11 (1) |
| Sr(2)                                  | 4956(2)  | 2542(3)  | 7093(2)  | 9(1)   |
| Se(1)                                  | 5076(2)  | 2939(4)  | 3660(3)  | 13(1)  |
| Se(2)                                  | 8301(2)  | 7608(4)  | 4398(2)  | 11 (1) |
| Se(3)                                  | 5771(2)  | 7662(4)  | 5658(2)  | 10(1)  |
| Se(4)                                  | 7526(2)  | 2030(4)  | 6361 (3) | 12 (1) |
| O(1)                                   | 4334(10) | 3680(30) | 2915(10) | 23(4)  |
| O(2)                                   | 5652(11) | 220(30)  | 3319(11) | 19(4)  |
| O(3)                                   | 6000(9)  | 5110(30) | 3434(10) | 9(3)   |
| O(4)                                   | 8358(11) | 4680(30) | 4021(10) | 37(5)  |
| O(5)                                   | 7242(11) | 8860(30) | 3998(10) | 24(4)  |
| O(6)                                   | 5468(16) | 7770(30) | 4714(12) | 18(5)  |
| O(7)                                   | 4716(9)  | 8880(20) | 6097(9)  | 15(3)  |
| O(8)                                   | 5742(11) | 4550(30) | 5898(10) | 32(4)  |
| O(9)                                   | 7895(16) | 7100(30) | 5349(11) | 17(4)  |
| O(10)                                  | 8086(11) | 4760(30) | 6731(10) | 18(4)  |
| O(11)                                  | 8437(11) | -200(30) | 6626(12) | 21(4)  |
| O(12)                                  | 6752(9)  | 1280(30) | 7110(10) | 18(3)  |
| Be(1)                                  | 6120(20) | 7840(60) | 3940(20) | 14(7)  |
| Be(2)                                  | 8570(20) | 7030(60) | 6120(20) | 14(7)  |

**Table S2.** Selected bond lengths ( $\text{\AA}$ ) and angles (degrees) for  $\text{Ca}_3\text{Be}(\text{SeO}_3)_4$  and  $\text{SrBe}(\text{SeO}_3)_2$ .

| $\text{Ca}_3\text{Be}(\text{SeO}_3)_4$ |          |              |          |  |
|----------------------------------------|----------|--------------|----------|--|
| Se(1)-O(1)                             | 1.671(3) | Ca(2)-O(1)   | 2.317(3) |  |
| Se(1)-O(2)                             | 1.715(3) | Ca(2)-O(1)#7 | 2.317(3) |  |
| Se(1)-O(3)                             | 1.684(3) | Ca(2)-O(3)   | 2.715(4) |  |
| Ca(1)-O(1)#4                           | 2.313(3) | Ca(2)-O(3)#2 | 2.715(4) |  |
| Ca(1)-O(1)                             | 2.313(3) | Ca(2)-O(3)#7 | 2.715(4) |  |
| Ca(1)-O(2)#2                           | 2.638(3) | Ca(2)-O(3)#1 | 2.715(4) |  |
| Ca(1)-O(2)#3                           | 2.638(3) | O(2)-Ca(1)#1 | 2.638(3) |  |
| Ca(1)-O(3)#2                           | 2.677(4) | O(2)-Be(1)   | 1.658(4) |  |
| Ca(1)-O(3)#3                           | 2.677(4) | O(3)-Ca(1)#8 | 2.386(4) |  |
| Ca(1)-O(3)#5                           | 2.386(4) | O(3)-Ca(1)#1 | 2.677(4) |  |
| Ca(1)-O(3)#6                           | 2.386(4) | Be(1)-O(2)#9 | 1.658(4) |  |

|                     |            |                      |            |
|---------------------|------------|----------------------|------------|
| Ca(2)-O(1)#1        | 2.317(3)   | Be(1)-O(2)#10        | 1.658(4)   |
| Ca(2)-O(1)#2        | 2.317(3)   | Be(1)-O(2)#3         | 1.658(4)   |
| O(1)-Se(1)-O(2)     | 102.83(19) | O(1)#7-Ca(2)-O(3)    | 118.79(11) |
| O(1)-Se(1)-O(3)     | 98.86(17)  | O(1)#7-Ca(2)-O(3)#1  | 70.05(11)  |
| O(3)-Se(1)-O(2)     | 98.54(17)  | O(1)#1-Ca(2)-O(3)#7  | 110.85(12) |
| O(1)#4-Ca(1)-O(1)   | 81.63(19)  | O(1)#2-Ca(2)-O(3)#1  | 118.79(12) |
| O(1)-Ca(1)-O(2)#2   | 81.50(13)  | O(1)#1-Ca(2)-O(3)    | 70.05(11)  |
| O(1)#4-Ca(1)-O(2)#2 | 72.21(12)  | O(1)#1-Ca(2)-O(3)#1  | 60.24(11)  |
| O(1)#4-Ca(1)-O(2)#3 | 81.50(13)  | O(1)#2-Ca(2)-O(3)#7  | 70.05(11)  |
| O(1)-Ca(1)-O(2)#3   | 72.21(12)  | O(1)-Ca(2)-O(3)#2    | 70.05(11)  |
| O(1)#4-Ca(1)-O(3)#3 | 70.81(12)  | O(1)-Ca(2)-O(3)      | 60.24(11)  |
| O(1)-Ca(1)-O(3)#3   | 125.33(12) | O(1)#7-Ca(2)-O(3)#2  | 110.85(12) |
| O(1)#4-Ca(1)-O(3)#5 | 167.11(13) | O(1)#2-Ca(2)-O(3)    | 110.85(12) |
| O(1)-Ca(1)-O(3)#5   | 97.50(13)  | O(1)#2-Ca(2)-O(3)#2  | 60.24(11)  |
| O(1)#4-Ca(1)-O(3)#2 | 125.33(12) | O(1)#1-Ca(2)-O(3)#2  | 118.79(12) |
| O(1)-Ca(1)-O(3)#2   | 70.81(12)  | O(1)#7-Ca(2)-O(3)#7  | 60.24(11)  |
| O(1)#4-Ca(1)-O(3)#6 | 97.50(13)  | O(3)#1-Ca(2)-O(3)#7  | 129.74(9)  |
| O(1)-Ca(1)-O(3)#6   | 167.11(13) | O(3)#1-Ca(2)-O(3)#2  | 73.82(15)  |
| O(2)#3-Ca(1)-O(2)#2 | 145.15(17) | O(3)#2-Ca(2)-O(3)    | 129.74(9)  |
| O(2)#3-Ca(1)-O(3)#3 | 57.97(11)  | O(3)#1-Ca(2)-O(3)    | 129.74(9)  |
| O(2)#2-Ca(1)-O(3)#3 | 128.99(11) | O(3)#7-Ca(2)-O(3)    | 73.82(15)  |
| O(2)#3-Ca(1)-O(3)#2 | 128.99(11) | O(3)#2-Ca(2)-O(3)#7  | 129.74(9)  |
| O(2)#2-Ca(1)-O(3)#2 | 57.97(11)  | Se(1)-O(1)-Ca(1)     | 130.11(18) |
| O(3)#5-Ca(1)-O(2)#3 | 85.98(11)  | Se(1)-O(1)-Ca(2)     | 108.19(15) |
| O(3)#6-Ca(1)-O(2)#3 | 120.49(12) | Ca(1)-O(1)-Ca(2)     | 121.69(15) |
| O(3)#5-Ca(1)-O(2)#2 | 120.49(12) | Se(1)-O(2)-Ca(1)#1   | 102.02(16) |
| O(3)#6-Ca(1)-O(2)#2 | 85.98(11)  | Be(1)-O(2)-Se(1)     | 117.8(2)   |
| O(3)#6-Ca(1)-O(3)#2 | 99.88(10)  | Be(1)-O(2)-Ca(1)#1   | 139.38(18) |
| O(3)#5-Ca(1)-O(3)#3 | 99.88(10)  | Se(1)-O(3)-Ca(1)#8   | 140.0(2)   |
| O(3)#2-Ca(1)-O(3)#3 | 161.02(17) | Se(1)-O(3)-Ca(1)#1   | 101.41(16) |
| O(3)#6-Ca(1)-O(3)#3 | 65.65(14)  | Se(1)-O(3)-Ca(2)     | 92.36(15)  |
| O(3)#5-Ca(1)-O(3)#2 | 65.65(14)  | Ca(1)#8-O(3)-Ca(1)#1 | 114.35(14) |
| O(3)#5-Ca(1)-O(3)#6 | 86.19(18)  | Ca(1)#8-O(3)-Ca(2)   | 100.00(13) |
| O(1)-Ca(2)-O(1)#1   | 90.005(2)  | Ca(1)#1-O(3)-Ca(2)   | 97.17(12)  |
| O(1)#7-Ca(2)-O(1)#2 | 90.005(2)  | O(2)#3-Be(1)-O(2)#10 | 111.0(3)   |
| O(1)-Ca(2)-O(1)#7   | 178.95(17) | O(2)#3-Be(1)-O(2)    | 108.71(13) |
| O(1)#7-Ca(2)-O(1)#1 | 90.005(2)  | O(2)#9-Be(1)-O(2)    | 111.0(3)   |
| O(1)#2-Ca(2)-O(1)#1 | 178.95(17) | O(2)#9-Be(1)-O(2)#3  | 108.71(13) |
| O(1)-Ca(2)-O(1)#2   | 90.005(2)  | O(2)#10-Be(1)-O(2)   | 108.71(13) |
| O(1)-Ca(2)-O(3)#1   | 110.85(12) | O(2)#9-Be(1)-O(2)#10 | 108.71(13) |
| O(1)-Ca(2)-O(3)#7   | 118.79(11) |                      |            |

Symmetry transformations used to generate equivalent atoms:

#1  $y+1/4, -x+7/4, -z+3/4$  #2  $-y+7/4, x-1/4, -z+3/4$  #3  $y+1/4, -x+3/4, -z+3/4$  #4  $-x+2, -y+1/2, z+0$  #5  $y+1/4, -x+5/4, z+1/4$   
#6  $-y+7/4, x-3/4, z+1/4$  #7  $-x+2, -y+3/2, z+0$  #8  $-y+5/4, x-1/4, z-1/4$  #9  $-x+1, -y+1/2, z+0$  #10  $-y+3/4, x-1/4, -z+3/4$

SrBe(SeO<sub>3</sub>)<sub>2</sub>

|                      |           |                       |           |
|----------------------|-----------|-----------------------|-----------|
| Sr(1)-O(1)#2         | 2.575(14) | Se(4)-O(10)           | 1.703(16) |
| Sr(1)-O(2)           | 2.842(16) | Se(4)-O(11)           | 1.741(16) |
| Sr(1)-O(3)           | 2.579(14) | Se(4)-O(12)           | 1.692(14) |
| Sr(1)-O(4)           | 2.445(16) | O(1)-Sr(1)#6          | 2.575(14) |
| Sr(1)-O(5)#3         | 2.594(16) | O(1)-Sr(2)#8          | 2.563(16) |
| Sr(1)-O(10)#4        | 2.592(17) | O(2)-Sr(2)#11         | 2.637(18) |
| Sr(1)-O(11)#1        | 2.816(19) | O(2)-Be(1)#3          | 1.72(3)   |
| Sr(1)-O(12)#1        | 2.595(14) | O(3)-Sr(2)#8          | 2.876(17) |
| Sr(2)-O(1)#5         | 2.563(16) | O(3)-Be(1)            | 1.64(3)   |
| Sr(2)-O(2)#7         | 2.637(18) | O(5)-Sr(1)#9          | 2.594(16) |
| Sr(2)-O(3)#5         | 2.876(17) | O(5)-Be(1)            | 1.62(4)   |
| Sr(2)-O(7)#3         | 2.531(14) | O(6)-Be(1)            | 1.58(4)   |
| Sr(2)-O(8)           | 2.505(17) | O(7)-Sr(2)#9          | 2.531(14) |
| Sr(2)-O(10)#6        | 2.872(15) | O(7)-Be(2)#12         | 1.63(3)   |
| Sr(2)-O(11)#6        | 2.598(16) | O(9)-Be(2)            | 1.59(4)   |
| Sr(2)-O(12)          | 2.532(13) | O(10)-Sr(1)#13        | 2.592(17) |
| Se(1)-O(1)           | 1.659(15) | O(10)-Sr(2)#2         | 2.872(15) |
| Se(1)-O(2)           | 1.693(16) | O(10)-Be(2)           | 1.69(4)   |
| Se(1)-O(3)           | 1.718(14) | O(11)-Sr(1)#10        | 2.816(19) |
| Se(2)-O(4)           | 1.622(14) | O(11)-Sr(2)#2         | 2.598(16) |
| Se(2)-O(5)           | 1.719(15) | O(11)-Be(2)#3         | 1.66(3)   |
| Se(2)-O(9)           | 1.720(19) | O(12)-Sr(1)#10        | 2.595(14) |
| Se(3)-O(6)           | 1.65(2)   | Be(1)-O(2)#9          | 1.72(3)   |
| Se(3)-O(7)           | 1.733(13) | Be(2)-O(7)#14         | 1.63(3)   |
| Se(3)-O(8)           | 1.633(15) | Be(2)-O(11)#9         | 1.66(3)   |
| O(1)#2-Sr(1)-O(2)    | 140.5(5)  | O(4)-Se(2)-O(9)       | 104.1(9)  |
| O(1)#2-Sr(1)-O(3)    | 153.4(5)  | O(5)-Se(2)-O(9)       | 98.8(9)   |
| O(1)#2-Sr(1)-O(5)#3  | 88.7(5)   | O(6)-Se(3)-O(7)       | 101.2(9)  |
| O(1)#2-Sr(1)-O(10)#4 | 99.4(5)   | O(8)-Se(3)-O(6)       | 105.5(8)  |
| O(1)#2-Sr(1)-O(11)#1 | 121.6(5)  | O(8)-Se(3)-O(7)       | 102.8(7)  |
| O(1)#2-Sr(1)-O(12)#1 | 77.2(5)   | O(10)-Se(4)-O(11)     | 96.7(9)   |
| O(3)-Sr(1)-O(2)      | 55.6(5)   | O(12)-Se(4)-O(10)     | 100.9(7)  |
| O(3)-Sr(1)-O(5)#3    | 92.1(5)   | O(12)-Se(4)-O(11)     | 96.1(8)   |
| O(3)-Sr(1)-O(10)#4   | 106.9(4)  | Sr(2)#8-O(1)-Sr(1)#6  | 123.2(6)  |
| O(3)-Sr(1)-O(11)#1   | 71.5(4)   | Se(1)-O(1)-Sr(1)#6    | 122.0(8)  |
| O(3)-Sr(1)-O(12)#1   | 95.9(4)   | Se(1)-O(1)-Sr(2)#8    | 110.5(7)  |
| O(4)-Sr(1)-O(1)#2    | 69.4(5)   | Sr(2)#11-O(2)-Sr(1)   | 108.5(6)  |
| O(4)-Sr(1)-O(2)      | 116.2(6)  | Se(1)-O(2)-Sr(1)      | 99.0(7)   |
| O(4)-Sr(1)-O(3)      | 84.3(5)   | Se(1)-O(2)-Sr(2)#11   | 123.8(8)  |
| O(4)-Sr(1)-O(5)#3    | 82.6(6)   | Se(1)-O(2)-Be(1)#3    | 122.6(14) |
| O(4)-Sr(1)-O(10)#4   | 168.9(5)  | Be(1)#3-O(2)-Sr(1)    | 95.4(13)  |
| O(4)-Sr(1)-O(11)#1   | 128.0(5)  | Be(1)#3-O(2)-Sr(2)#11 | 102.8(12) |
| O(4)-Sr(1)-O(12)#1   | 82.8(5)   | Sr(1)-O(3)-Sr(2)#8    | 108.5(6)  |
| O(5)#3-Sr(1)-O(2)    | 55.7(5)   | Se(1)-O(3)-Sr(1)      | 108.7(7)  |
| O(5)#3-Sr(1)-O(11)#1 | 141.3(5)  | Se(1)-O(3)-Sr(2)#8    | 96.3(6)   |
| O(5)#3-Sr(1)-O(12)#1 | 162.5(5)  | Be(1)-O(3)-Sr(1)      | 121.9(13) |
| O(10)#4-Sr(1)-O(2)   | 71.9(4)   | Be(1)-O(3)-Sr(2)#8    | 95.9(13)  |
| O(10)#4-Sr(1)-O(5)#3 | 97.0(5)   | Be(1)-O(3)-Se(1)      | 120.2(14) |

|                       |          |                        |           |
|-----------------------|----------|------------------------|-----------|
| O(10)#4-Sr(1)-O(11)#1 | 57.7(6)  | Se(2)-O(4)-Sr(1)       | 133.7(8)  |
| O(10)#4-Sr(1)-O(12)#1 | 95.5(6)  | Se(2)-O(5)-Sr(1)#9     | 115.0(7)  |
| O(11)#1-Sr(1)-O(2)    | 87.0(4)  | Be(1)-O(5)-Sr(1)#9     | 108.2(13) |
| O(12)#1-Sr(1)-O(2)    | 140.7(5) | Be(1)-O(5)-Se(2)       | 134.4(14) |
| O(12)#1-Sr(1)-O(11)#1 | 56.1(4)  | Be(1)-O(6)-Se(3)       | 131.3(19) |
| O(1)#5-Sr(2)-O(2)#7   | 95.3(6)  | Se(3)-O(7)-Sr(2)#9     | 116.2(6)  |
| O(1)#5-Sr(2)-O(3)#5   | 55.4(4)  | Be(2)#12-O(7)-Sr(2)#9  | 108.6(13) |
| O(1)#5-Sr(2)-O(10)#6  | 139.2(5) | Be(2)#12-O(7)-Se(3)    | 134.6(14) |
| O(1)#5-Sr(2)-O(11)#6  | 94.3(5)  | Se(3)-O(8)-Sr(2)       | 127.3(8)  |
| O(2)#7-Sr(2)-O(3)#5   | 57.3(5)  | Be(2)-O(9)-Se(2)       | 125.5(18) |
| O(2)#7-Sr(2)-O(10)#6  | 70.8(4)  | Sr(1)#13-O(10)-Sr(2)#2 | 108.8(6)  |
| O(7)#3-Sr(2)-O(1)#5   | 164.0(5) | Se(4)-O(10)-Sr(1)#13   | 126.0(7)  |
| O(7)#3-Sr(2)-O(2)#7   | 95.2(5)  | Se(4)-O(10)-Sr(2)#2    | 98.3(6)   |
| O(7)#3-Sr(2)-O(3)#5   | 140.5(4) | Be(2)-O(10)-Sr(1)#13   | 103.7(12) |
| O(7)#3-Sr(2)-O(10)#6  | 56.2(4)  | Be(2)-O(10)-Sr(2)#2    | 93.7(12)  |
| O(7)#3-Sr(2)-O(11)#6  | 94.4(6)  | Be(2)-O(10)-Se(4)      | 120.5(14) |
| O(7)#3-Sr(2)-O(12)    | 86.9(4)  | Sr(2)#2-O(11)-Sr(1)#10 | 109.8(7)  |
| O(8)-Sr(2)-O(1)#5     | 88.2(5)  | Se(4)-O(11)-Sr(1)#10   | 98.7(7)   |
| O(8)-Sr(2)-O(2)#7     | 170.3(5) | Se(4)-O(11)-Sr(2)#2    | 107.9(7)  |
| O(8)-Sr(2)-O(3)#5     | 131.3(5) | Be(2)#3-O(11)-Sr(1)#10 | 95.9(14)  |
| O(8)-Sr(2)-O(7)#3     | 79.6(5)  | Be(2)#3-O(11)-Sr(2)#2  | 120.9(13) |
| O(8)-Sr(2)-O(10)#6    | 112.0(6) | Be(2)#3-O(11)-Se(4)    | 119.8(15) |
| O(8)-Sr(2)-O(11)#6    | 83.3(5)  | Sr(2)-O(12)-Sr(1)#10   | 125.2(6)  |
| O(8)-Sr(2)-O(12)      | 72.5(5)  | Se(4)-O(12)-Sr(1)#10   | 109.0(6)  |
| O(10)#6-Sr(2)-O(3)#5  | 86.2(4)  | Se(4)-O(12)-Sr(2)      | 122.5(7)  |
| O(11)#6-Sr(2)-O(2)#7  | 105.4(5) | O(3)-Be(1)-O(2)#9      | 104(2)    |
| O(11)#6-Sr(2)-O(3)#5  | 70.2(4)  | O(5)-Be(1)-O(2)#9      | 99.4(18)  |
| O(11)#6-Sr(2)-O(10)#6 | 55.9(5)  | O(5)-Be(1)-O(3)        | 114(2)    |
| O(12)-Sr(2)-O(1)#5    | 79.6(5)  | O(6)-Be(1)-O(2)#9      | 108.1(19) |
| O(12)-Sr(2)-O(2)#7    | 99.2(5)  | O(6)-Be(1)-O(3)        | 110.7(19) |
| O(12)-Sr(2)-O(3)#5    | 122.3(5) | O(6)-Be(1)-O(5)        | 119(2)    |
| O(12)-Sr(2)-O(10)#6   | 139.3(4) | O(7)#14-Be(2)-O(10)    | 101.0(18) |
| O(12)-Sr(2)-O(11)#6   | 155.1(6) | O(7)#14-Be(2)-O(11)#9  | 111(2)    |
| O(1)-Se(1)-O(2)       | 102.1(8) | O(9)-Be(2)-O(7)#14     | 123(2)    |
| O(1)-Se(1)-O(3)       | 97.7(8)  | O(9)-Be(2)-O(10)       | 107(2)    |
| O(2)-Se(1)-O(3)       | 96.2(8)  | O(9)-Be(2)-O(11)#9     | 110.1(19) |
| O(4)-Se(2)-O(5)       | 103.1(8) | O(11)#9-Be(2)-O(10)    | 103(2)    |

Symmetry transformations used to generate equivalent atoms:

#1  $-x+3/2, y+1/2, z-1/2$  #2  $x+1/2, -y+1/2, z$  #3  $x, y-1, z$  #4  $-x+3/2, y-1/2, z-1/2$  #5  $-x+1, -y+1, z+1/2$  #6  $x-1/2, -y+1/2, z$  #7  $-x+1, -y, z+1/2$  #8  $-x+1, -y+1, z-1/2$  #9  $x, y+1, z$  #10  $-x+3/2, y-1/2, z+1/2$  #11  $-x+1, -y, z-1/2$  #12  $x-1/2, -y+3/2, z$  #13  $-x+3/2, y+1/2, z+1/2$  #14  $x+1/2, -y+3/2, z$

**Table S3.** Anisotropic displacement parameters ( $\text{\AA}^2 \times 10^3$ ) for  $\text{Ca}_3\text{Be}(\text{SeO}_3)_4$  and  $\text{SrBe}(\text{SeO}_3)_2$ .

The anisotropic displacement factor exponent takes the form:  $-2\pi^2 [ h^2 a^{*2} U_{11} + \dots + 2hka^* b^* U_{12} ]$

| Ca <sub>3</sub> Be(SeO <sub>3</sub> ) <sub>4</sub> |       |       |       |       |        |       |  |
|----------------------------------------------------|-------|-------|-------|-------|--------|-------|--|
|                                                    | U11   | U22   | U33   | U23   | U13    | U12   |  |
| Se(1)                                              | 12(1) | 11(1) | 14(1) | -1(1) | 0(1)   | 1(1)  |  |
| Ca(1)                                              | 17(1) | 13(1) | 8(1)  | 0     | 0      | 2(1)  |  |
| Ca(2)                                              | 12(1) | 12(1) | 25(1) | 0     | 0      | 0     |  |
| O(1)                                               | 26(2) | 13(2) | 22(2) | 7(1)  | -10(1) | -3(1) |  |
| O(2)                                               | 11(2) | 17(2) | 28(2) | 3(1)  | 1(1)   | 0(1)  |  |
| O(3)                                               | 29(2) | 18(2) | 18(2) | 7(1)  | 6(1)   | 4(1)  |  |
| Be(1)                                              | 15(4) | 15(4) | 22(6) | 0     | 0      | 0     |  |

| SrBe(SeO <sub>3</sub> ) <sub>2</sub> |        |       |        |        |        |       |  |
|--------------------------------------|--------|-------|--------|--------|--------|-------|--|
|                                      | U11    | U22   | U33    | U23    | U13    | U12   |  |
| Sr(1)                                | 13(2)  | 11(2) | 9(2)   | 0(1)   | 0(1)   | 0(1)  |  |
| Sr(2)                                | 4(1)   | 13(2) | 8(2)   | -1(1)  | 2(1)   | 0(1)  |  |
| Se(1)                                | 9(1)   | 20(1) | 10(1)  | 3(2)   | 2(1)   | 1(1)  |  |
| Se(2)                                | 9(1)   | 21(2) | 5(2)   | 0(1)   | 0(1)   | 0(1)  |  |
| Se(3)                                | 6(1)   | 13(2) | 10(2)  | 0(1)   | 2(1)   | 0(1)  |  |
| Se(4)                                | 7(1)   | 21(1) | 6(1)   | -2(2)  | -1(1)  | 1(1)  |  |
| O(1)                                 | 18(8)  | 34(9) | 16(8)  | 2(7)   | -6(6)  | -1(6) |  |
| O(2)                                 | 32(10) | 6(7)  | 20(9)  | -5(6)  | 10(7)  | -3(7) |  |
| O(3)                                 | 14(4)  | 5(4)  | 9(5)   | -4(3)  | 2(4)   | 2(3)  |  |
| O(4)                                 | 30(11) | 32(9) | 48(11) | -29(8) | -15(8) | 22(7) |  |
| O(5)                                 | 20(8)  | 30(9) | 20(9)  | -2(7)  | 3(7)   | 0(7)  |  |
| O(6)                                 | 13(6)  | 25(7) | 16(7)  | 2(5)   | -1(5)  | -6(5) |  |
| O(7)                                 | 6(7)   | 16(7) | 22(9)  | -14(6) | 6(6)   | -6(6) |  |
| O(8)                                 | 45(11) | 24(8) | 28(10) | 10(7)  | 19(8)  | 6(7)  |  |
| O(9)                                 | 12(6)  | 26(6) | 14(7)  | 3(5)   | -2(5)  | 1(5)  |  |
| O(10)                                | 27(9)  | 18(8) | 7(8)   | -3(6)  | 1(7)   | 1(7)  |  |
| O(11)                                | 26(6)  | 10(6) | 27(7)  | 0(5)   | -8(5)  | -4(5) |  |
| O(12)                                | 18(6)  | 16(5) | 20(6)  | 9(5)   | 1(5)   | -3(4) |  |
| Be(1)                                | 11(9)  | 16(9) | 13(9)  | -2(6)  | 0(6)   | 0(6)  |  |
| Be(2)                                | 13(9)  | 14(8) | 14(9)  | -5(6)  | -1(6)  | 1(6)  |  |

**Table S4.** Direction and magnitude of the dipole moment of [SeO<sub>3</sub>]<sup>2-</sup> groups in Ca<sub>3</sub>Be(SeO<sub>3</sub>)<sub>4</sub> and SrBe(SeO<sub>3</sub>)<sub>2</sub>.

|         | Species                           | D <sub>x</sub> | D <sub>y</sub> | D <sub>z</sub> | Magnitude |
|---------|-----------------------------------|----------------|----------------|----------------|-----------|
|         | [SeO <sub>3</sub> ] <sup>2-</sup> | -2.348         | 8.341          | 5.000          | 10.004    |
|         | [SeO <sub>3</sub> ] <sup>2-</sup> | -8.342         | -2.349         | -5.000         | 10.006    |
|         | [SeO <sub>3</sub> ] <sup>2-</sup> | 2.346          | -8.341         | 5.004          | 10.006    |
|         | [SeO <sub>3</sub> ] <sup>2-</sup> | 8.342          | 2.347          | -5.002         | 10.005    |
|         | Absolute value addition           | <b>21.377</b>  | <b>21.378</b>  | <b>20.005</b>  | /         |
| Layer 1 | [SeO <sub>3</sub> ] <sup>2-</sup> | -7.399         | -5.270         | 0.707          | 9.111     |
|         | [SeO <sub>3</sub> ] <sup>2-</sup> | 3.506          | -0.286         | 9.531          | 10.160    |
|         | [SeO <sub>3</sub> ] <sup>2-</sup> | 4.081          | 0.323          | -9.989         | 10.796    |
|         | [SeO <sub>3</sub> ] <sup>2-</sup> | -7.486         | -4.458         | -2.305         | 9.012     |
|         | [SeO <sub>3</sub> ] <sup>2-</sup> | -7.399         | 5.270          | 0.707          | 9.111     |
|         | [SeO <sub>3</sub> ] <sup>2-</sup> | 3.506          | 0.286          | 9.531          | 10.160    |
|         | [SeO <sub>3</sub> ] <sup>2-</sup> | 4.081          | -0.323         | -9.989         | 10.796    |
|         | [SeO <sub>3</sub> ] <sup>2-</sup> | -7.486         | 4.458          | -2.305         | 9.012     |
|         | Absolute value addition           | <b>44.942</b>  | <b>20.676</b>  | <b>45.064</b>  | /         |
| Layer 2 | [SeO <sub>3</sub> ] <sup>2-</sup> | 7.399          | 5.270          | 0.707          | 9.111     |
|         | [SeO <sub>3</sub> ] <sup>2-</sup> | -3.506         | 0.286          | 9.531          | 10.160    |
|         | [SeO <sub>3</sub> ] <sup>2-</sup> | -4.081         | -0.323         | -9.989         | 10.796    |
|         | [SeO <sub>3</sub> ] <sup>2-</sup> | 7.486          | 4.458          | -2.305         | 9.012     |
|         | [SeO <sub>3</sub> ] <sup>2-</sup> | 7.399          | -5.270         | 0.707          | 9.111     |
|         | [SeO <sub>3</sub> ] <sup>2-</sup> | -3.506         | -0.286         | 9.531          | 10.160    |
|         | [SeO <sub>3</sub> ] <sup>2-</sup> | -4.081         | 0.323          | -9.989         | 10.796    |
|         | [SeO <sub>3</sub> ] <sup>2-</sup> | 7.486          | -4.458         | -2.305         | 9.012     |
|         | Absolute value addition           | <b>44.942</b>  | <b>20.676</b>  | <b>45.064</b>  | /         |

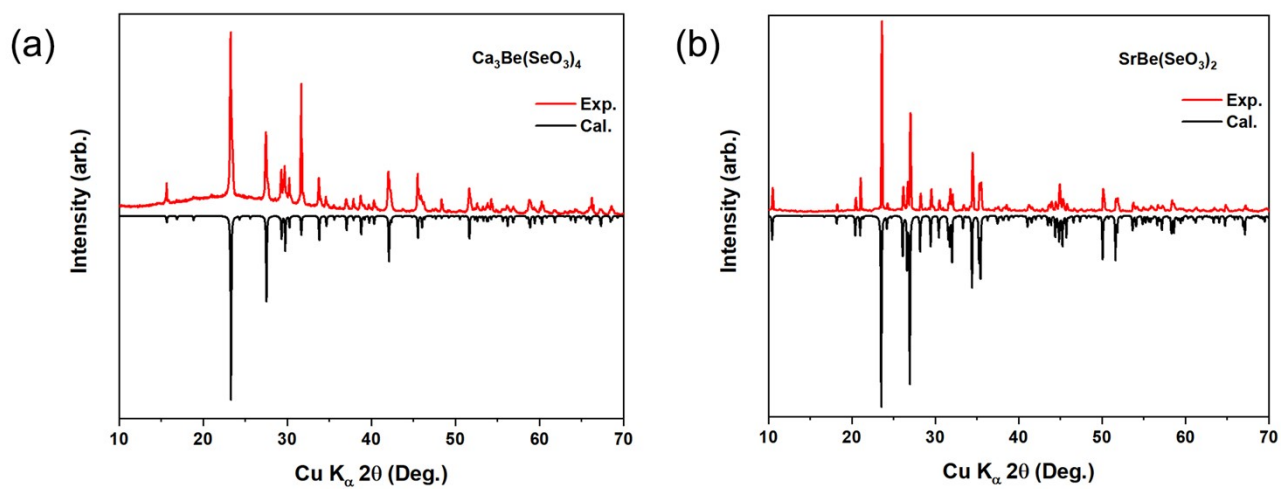

Figure S1. Powder X-ray diffraction for (a)  $\text{Ca}_3\text{Be}(\text{SeO}_3)_4$  and (b)  $\text{SrBe}(\text{SeO}_3)_2$ .

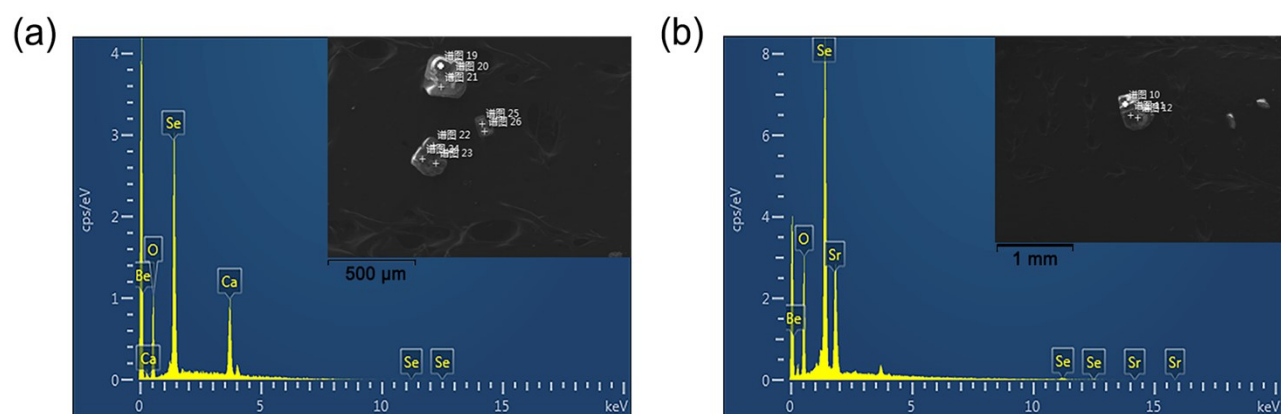

Figure S2. Energy dispersive X-ray spectroscopy (EDS) analysis for  $\text{Ca}_3\text{Be}(\text{SeO}_3)_4$  (a) and  $\text{SrBe}(\text{SeO}_3)_2$  (b).



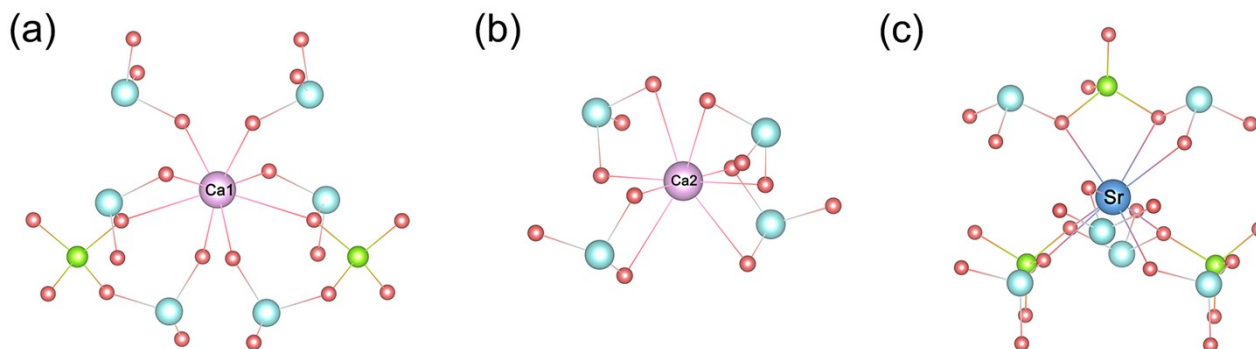

Figure S3. Atomic coordination forms of Ca-O (a,b) and Sr-O (c).

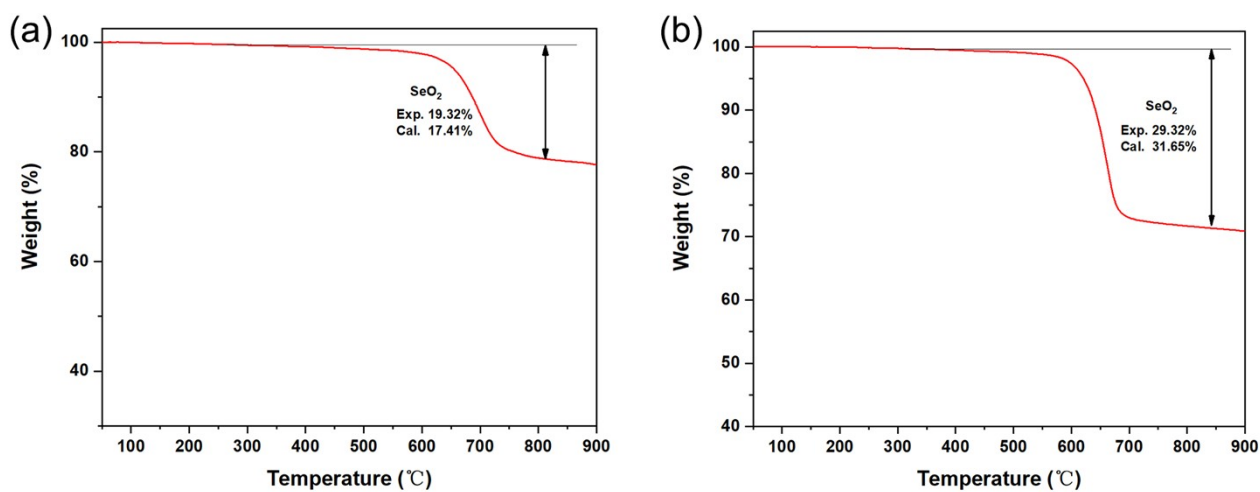

Figure S4. Thermogravimetric (TG) analysis for  $\text{Ca}_3\text{Be}(\text{SeO}_3)_4$  (a) and  $\text{SrBe}(\text{SeO}_3)_2$  (b).

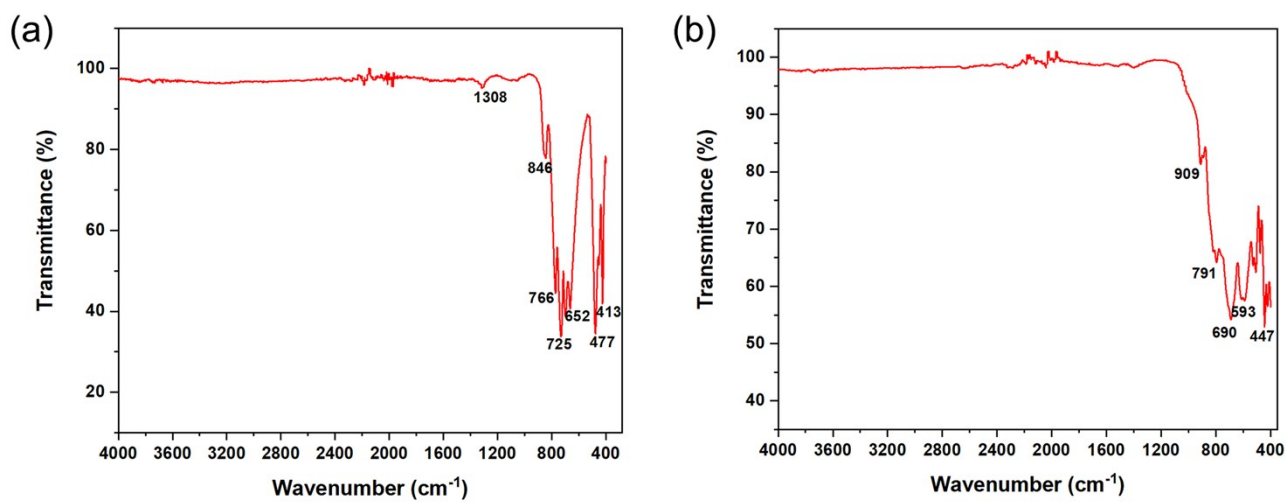

Figure S5. IR spectra for  $\text{Ca}_3\text{Be}(\text{SeO}_3)_4$  (a) and  $\text{SrBe}(\text{SeO}_3)_2$  (b).

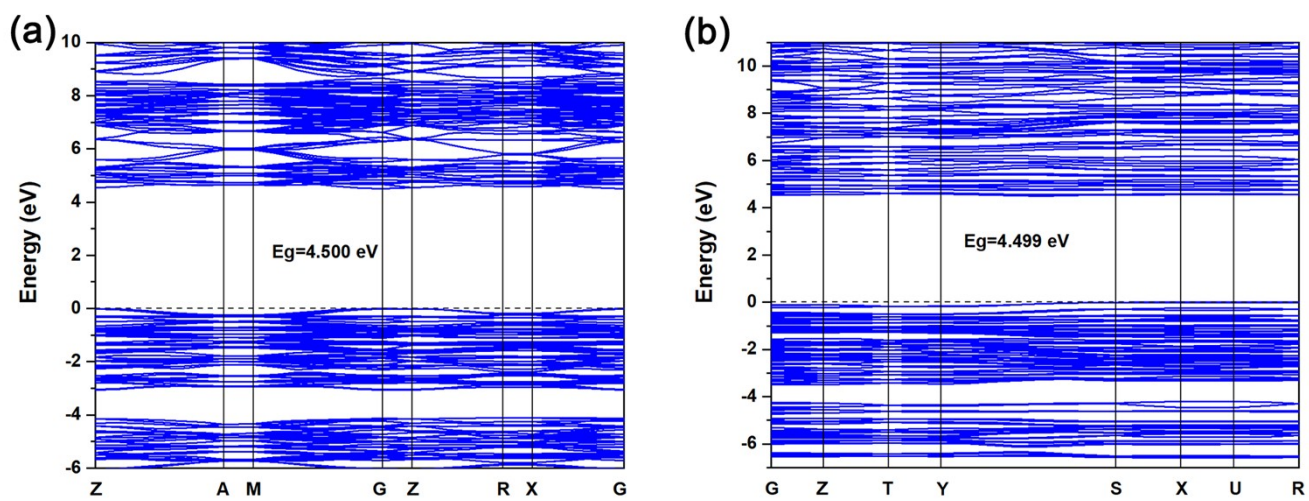

**Figure S6.** Calculated band structure for  $\text{Ca}_3\text{Be}(\text{SeO}_3)_4$  (a) and  $\text{SrBe}(\text{SeO}_3)_2$  (b).
